# Supplementary material
Source: publisher figshare collection journal article supplement (https://sage.figshare.com/ndownloader/files/13894451)
Supplement: Supplementary file 1 [file 13894451]

Supplemental Table 19. Zero-order correlations between key variables from Study 8.

PADAS = Positive Affect During Aggression Scale, SD3 = Short Dark Triad Scale, TAP = Taylor Aggression Paradigm, VSS = Victim Suffering Scale (short version). Gender is coded: male = 1, female = -1. \* $p < .05$ , \*\* $p < .01$ , \*\*\* $p < .001$

| Measure                       | 1      | 2      | 3     | 4      | 5      | 6    | 7      |
|-------------------------------|--------|--------|-------|--------|--------|------|--------|
| 1. Gender                     |        |        |       |        |        |      |        |
| 2. Sadism Index               | .27*** |        |       |        |        |      |        |
| 3. PADAS - Pleasure           | .08    | -.01   |       |        |        |      |        |
| 4. SD3 - Machiavellianism     | .13    | .38*** | -.03  |        |        |      |        |
| 5. SD3 - Narcissism           | .10    | .09    | .14*  | .24**  |        |      |        |
| 6. SD3 - Psychopathy          | .18**  | .59*** | -.03  | .52*** | .22**  |      |        |
| 7. Taylor Aggression Paradigm | .07    | .04    | .04   | .14*   | .26*** | .14* |        |
| 8. Victim Suffering Scale     | -.10   | .08    | -.15* | .20**  | -.01   | .16* | .37*** |
